# Supplementary material for: Bioenergetic strategy of microalgae for the biodegradation of tyrosol and hydroxytyrosol
Source: publisher site journal article supplement (doi:10.1515/znc-2016-0214), 2017-02-07
Supplement: Supplementary file 1 [file Supplementary_Material_FIG_1.pdf › Supplementary_Material_FIG_1.pdf]

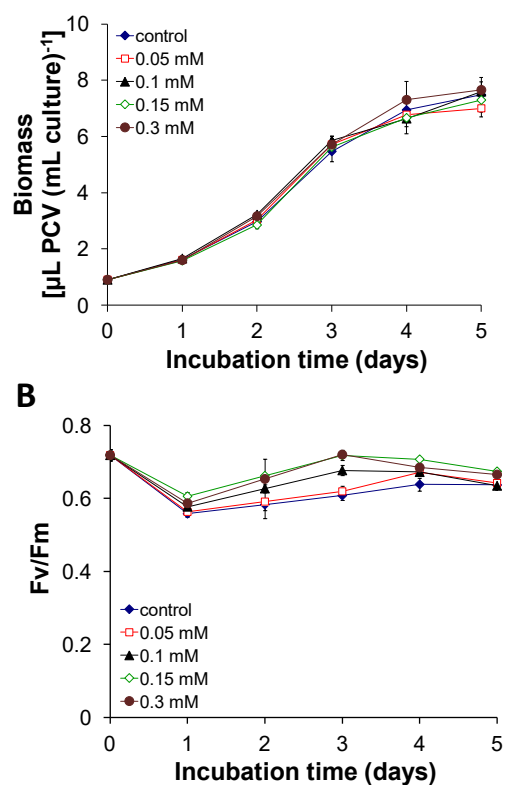

**Supplementary Material Fig. 1.** Influence of several tyrosol concentrations in *Scenedesmus obliquus* cultures growing in a closed system under mixotrophic conditions. **(A)** Growth kinetic curves. **(B)** Maximum yield of photochemistry ( $F_v/F_m$ ).

**A**
