# Supplementary material for: Bioenergetic strategy of microalgae for the biodegradation of tyrosol and hydroxytyrosol
Source: publisher site journal article supplement (doi:10.1515/znc-2016-0214), 2017-02-07
Supplement: Supplementary file 2 [file Supplementary_Material_FIG_2.pdf › Supplementary_Material_FIG_2.pdf]

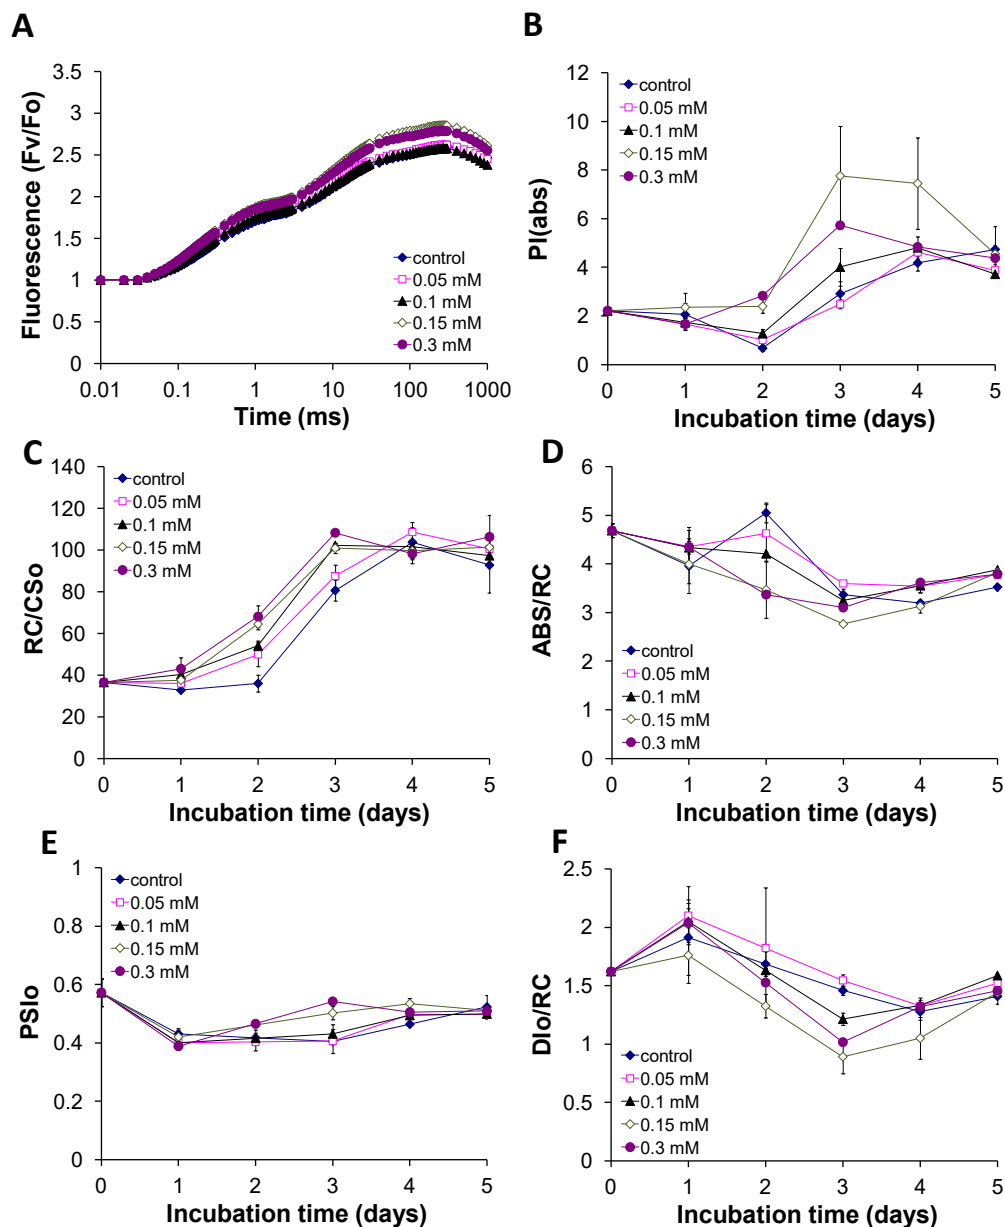

**Supplementary Material Fig. 2.** Influence of several tyrosol concentrations in *Scenedesmus obliquus* cultures growing under mixotrophic conditions. **(A)** Normalized to  $F_o$  fluorescence curves ( $F_v/F_o$ ) in the fifth incubation day. **(B)** Photosynthetic index [PI(abs)]. **(C)** Density of active photosynthetic reaction centers (RC/CSO). **(D)** Functional antenna size per active reaction center (ABS/RC). **(E)** Primary photochemistry (PSIo). **(F)** Dissipation energy per active reaction center (DIo/RC).
