# Supplementary material for: Bioenergetic strategy of microalgae for the biodegradation of tyrosol and hydroxytyrosol
Source: publisher site journal article supplement (doi:10.1515/znc-2016-0214), 2017-02-07
Supplement: Supplementary file 7 [file Supplementary_Material_FIG_7.pdf › Supplementary_Material_FIG_7.pdf]

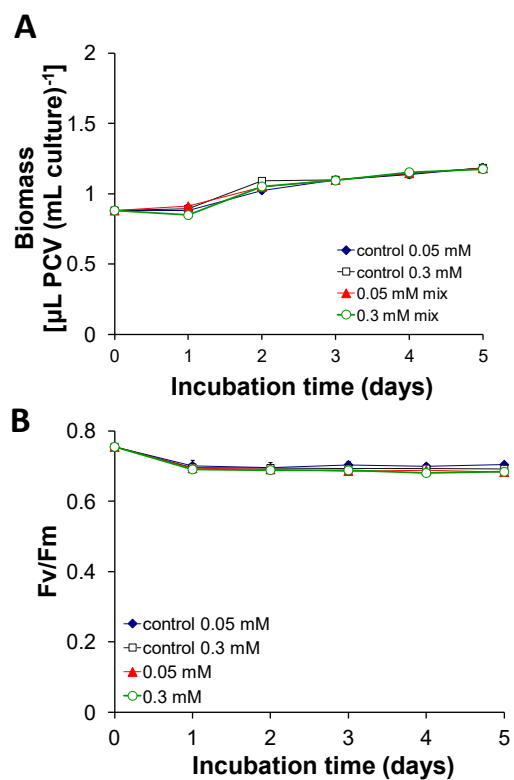

**Supplementary Material Fig. 7.** Influence of simultaneously supplied tyrosol and hydroxytyrosol at two concentrations (0.05 and 0.3 mM) in autotrophic *Scenedesmus obliquus* cultures. **(A)** Growth kinetic curves. **(B)** Maximum yield of photochemistry (Fv/Fm).
