# Supplementary material for: Bioenergetic strategy of microalgae for the biodegradation of tyrosol and hydroxytyrosol
Source: publisher site journal article supplement (doi:10.1515/znc-2016-0214), 2017-02-07
Supplement: Supplementary file 8 [file Supplementary_Material_FIG_8.pdf › Supplementary_Material_FIG_8.pdf]

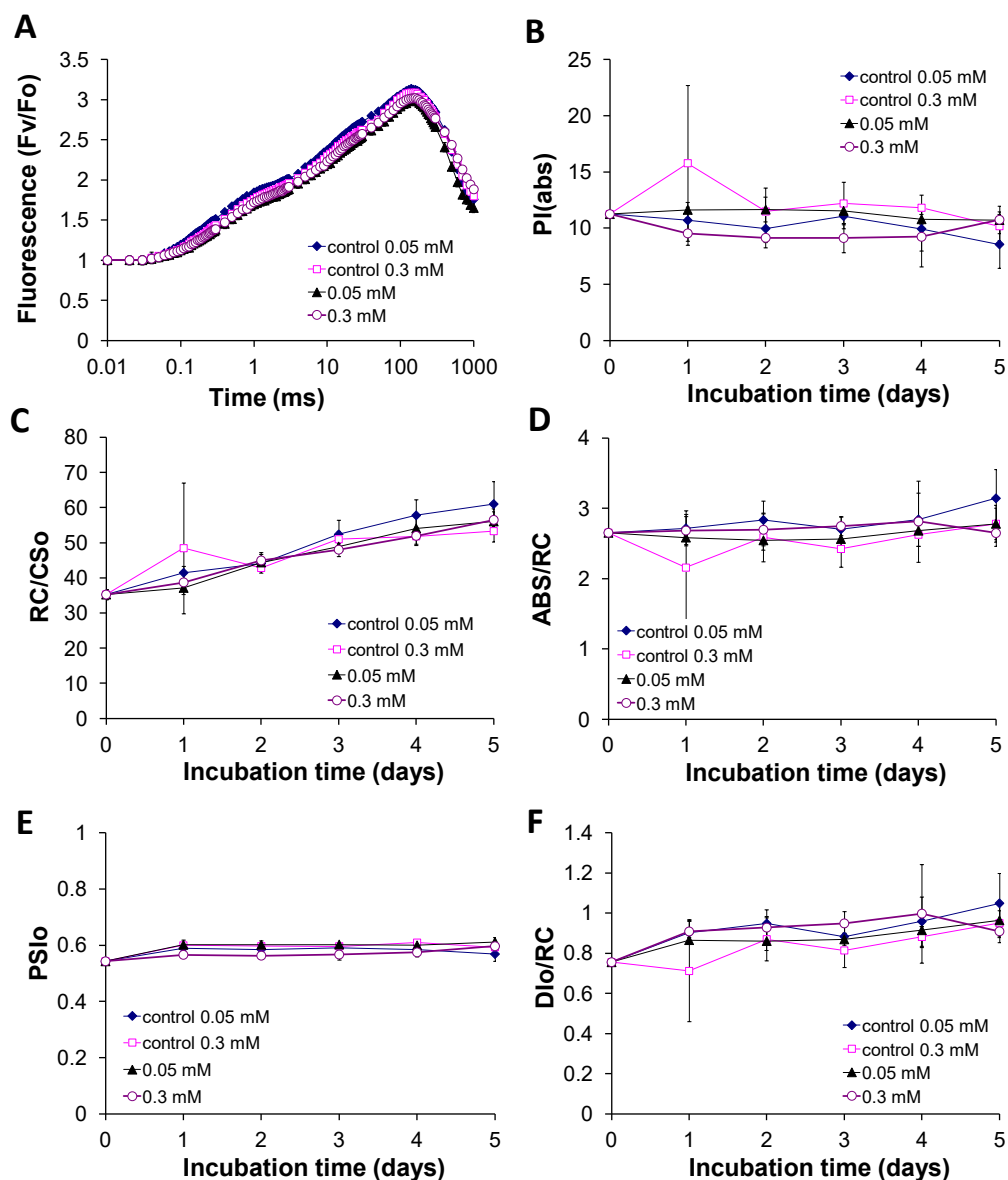

**Supplementary Material Fig. 8.** Influence of various simultaneously supplied tyrosol (trs) and hydroxytyrosol (hts) concentrations in autotrophic *Scenedesmus obliquus* cultures. **(A)** Normalized to  $F_0$  fluorescence curves ( $F_v/F_0$ ) in the fifth incubation day. **(B)** Photosynthetic index [PI(abs)]. **(C)** Density of active photosynthetic reaction centers (RC/CS<sub>0</sub>). **(D)** Functional antenna size per active reaction center (ABS/RC). **(E)** Primary photochemistry (PSI<sub>0</sub>). **(F)** Dissipation energy per active reaction center (DIO<sub>0</sub>/RC).
